# Supplementary material for: Long-term programming effect of early hypoxia and high carbohydrate diet at first-feeding on glucose metabolism in rainbow trout juveniles
Source: Oxford University Press journal article supplement (doi:10.1242/jeb.161406), 2017-01-01
Supplement: jeb161406supp.pdf [file jeb161406supp.pdf]

## Supplementary Information

### Supplementary Table S1

| Ingredient g/100g diet               | HC   | NC   | Challenge |
|--------------------------------------|------|------|-----------|
| Fish meal <sup>1</sup>               | 22.8 | 91.2 | 56.4      |
| Fish oil <sup>2</sup>                | 13.2 | 4.8  | 9.6       |
| Starch <sup>3</sup>                  | 40.0 | 0.0  | 30.0      |
| Glucose <sup>4</sup>                 | 20.0 | 0.0  | 0.0       |
| Vitamin mix <sup>5</sup>             | 1.0  | 1.0  | 1.0       |
| Mineral mix <sup>6</sup>             | 1.0  | 1.0  | 1.0       |
| Alginate <sup>7</sup>                | 2.0  | 2.0  | 2.0       |
| <i>Approximate composition</i>       |      |      |           |
| Dry matter, DM (% diet)              | 90.1 | 93.4 | 92.0      |
| Crude protein (% DM)                 | 18.0 | 63.0 | 41.9      |
| Crude lipids (% DM)                  | 15.8 | 16.1 | 12.9      |
| Gross energy (KJ g <sup>-1</sup> DM) | 21.6 | 22.4 | 21.1      |
| Ash (% DM)                           | 5.0  | 15.6 | 11.3      |
| Carbohydrates (% DM)                 | 48.8 | 2.4  | 26.8      |

**Table S1. Formulation and proximate composition of experimental diets used in this experiment.** HC, high carbohydrate diet; NC, no carbohydrate diet.<sup>1</sup> Sopropeche, Boulogne-sur-Mer, France; <sup>2</sup> Sopropeche, Boulogne-sur-Mer, France; <sup>3</sup> gelatinized corn starch (Roquette, Lestrem, France); <sup>4</sup> D-(+)-glucose (Sigma-Aldrich, G7021); <sup>5</sup> supplying (kg<sup>-1</sup> diet): 60 IU DL- $\alpha$ -tocopherol acetate, 5 mg sodium menadione bisulphate, 15,000 IU retinyl acetate, 3000 IU DL-cholecalciferol, 15 mg thiamine, 30 mg riboflavin, 15 mg pyridoxine, 0.05 mg vitamin B<sub>12</sub>, 175 mg nicotinic acid, 500 mg folic acid, 1000 mg inositol, 2.5 mg biotin, 50 mg calcium pantothenate and 2000 mg choline chloride; <sup>6</sup> supplying (kg<sup>-1</sup> diet): 2.15 g calcium carbonate (40% Ca), 1.24 g magnesium oxide (60% Mg), 0.2 g ferric citrate, 0.4 mg potassium iodide (75% I), 0.4 g zinc sulphate (36% Zn), 0.3 g copper sulphate (25% Cu), 0.3 g manganese sulphate (33% Mn), 5 g dibasic calcium phosphate (20% Ca, 18% P), 2 mg cobalt sulphate, 3 mg sodium selenite (30% Se), 0.9 g potassium chloride and 0.4 g sodium chloride; and <sup>7</sup> Louis François, Marne-la-Vallée, France.
